# Supplementary material for: Opioid Prescribing for Osteoarthritis: Cross-Sectional Survey among Primary Care Physicians, Rheumatologists, and Orthopaedic Surgeons
Source: MDPI journal article supplement (doi:10.3390/jcm12020589), 2023-01-11
Supplement: s1 [file s1]

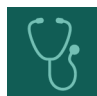

**Table S1.** Treatment strategy for patients with mild OA

|                                          | Primary care<br>physician<br>(n = 81) | Rheumatologist<br>(n = 35) | Orthopaedic<br>surgeon<br>(n = 37) | <i>P</i> value |
|------------------------------------------|---------------------------------------|----------------------------|------------------------------------|----------------|
| <b>First-line treatment for mild OA</b>  |                                       |                            |                                    |                |
| Lifestyle changes, e.g., diet/exercise   | 67 (82.7)                             | 32 (91.4)                  | 32 (86.5)                          | .4638          |
| Over-the-counter therapy                 | 52 (64.2)                             | 13 (37.1)                  | 24 (64.9)                          | .0162          |
| Dietary supplements                      | 27 (33.3)                             | 5 (14.3)                   | 10 (27.0)                          | .1077          |
| Nonselective NSAID                       | 32 (39.5)                             | 7 (20.0)                   | 13 (35.1)                          | .1241          |
| Selective NSAID                          | 16 (19.8)                             | 4 (11.4)                   | 7 (18.9)                           | .5434          |
| Other nonopioid analgesic                | 7 (8.6)                               | 3 (8.6)                    | 2 (5.4)                            | .8524          |
| Corticosteroid                           | 0 (0.0)                               | 0 (0.0)                    | 2 (5.4)                            | .1084          |
| Topical analgesic                        | 20 (24.7)                             | 6 (17.1)                   | 6 (16.2)                           | .4739          |
| None                                     | 1 (1.2)                               | 0 (0.0)                    | 0 (0.0)                            | 1              |
| <b>Second-line treatment for mild OA</b> |                                       |                            |                                    |                |
| Lifestyle changes, e.g., diet/exercise   | 11 (13.6)                             | 4 (11.4)                   | 2 (5.4)                            | .4623          |
| Over-the-counter therapy                 | 25 (30.9)                             | 16 (45.7)                  | 9 (24.3)                           | .1354          |
| Dietary supplements                      | 12 (14.8)                             | 6 (17.1)                   | 3 (8.1)                            | .5228          |
| Nonselective NSAID                       | 31 (38.3)                             | 11 (31.4)                  | 18 (48.6)                          | .3163          |
| Selective NSAID                          | 31 (38.3)                             | 11 (31.4)                  | 18 (48.6)                          | .3163          |
| Other nonopioid analgesic                | 25 (30.9)                             | 6 (17.1)                   | 14 (37.8)                          | .1433          |
| Weak opioid analgesic                    | 15 (18.5)                             | 3 (8.6)                    | 1 (2.7)                            | .0392          |
| Strong-acting opioid analgesic           | 2 (2.5)                               | 0 (0.0)                    | 0 (0.0)                            | 1              |
| Corticosteroid                           | 12 (14.8)                             | 6 (17.1)                   | 11 (29.7)                          | .1515          |
| Topical analgesic                        | 15 (18.5)                             | 11 (31.4)                  | 11 (29.7)                          | .2187          |
| Other (specify)                          | 0 (0.0)                               | 0 (0.0)                    | 1 (2.7)                            | .4706          |
| <b>Third-line treatment for mild OA</b>  |                                       |                            |                                    |                |
| Lifestyle changes, e.g., diet/exercise   | 10 (12.3)                             | 5 (14.3)                   | 2 (5.4)                            | .4349          |
| Over-the-counter therapy                 | 5 (6.2)                               | 2 (5.7)                    | 0 (0.0)                            | .3999          |
| Dietary supplements                      | 9 (11.1)                              | 5 (14.3)                   | 5 (13.5)                           | .8489          |
| Nonselective NSAID                       | 16 (19.8)                             | 13 (37.1)                  | 6 (16.2)                           | .0667          |
| Selective NSAID                          | 21 (25.9)                             | 8 (22.9)                   | 11 (29.7)                          | .8008          |
| Other nonopioid analgesic                | 17 (21.0)                             | 6 (17.1)                   | 9 (24.3)                           | .7553          |
| Weak opioid analgesic                    | 27 (33.3)                             | 6 (17.1)                   | 12 (32.4)                          | .192           |
| Strong-acting opioid analgesic           | 14 (17.3)                             | 5 (14.3)                   | 2 (5.4)                            | .1971          |
| Corticosteroid                           | 18 (22.2)                             | 9 (25.7)                   | 12 (32.4)                          | .4978          |
| Topical analgesic                        | 20 (24.7)                             | 3 (8.6)                    | 8 (21.6)                           | .1362          |
| Surgery                                  | 4 (4.9)                               | 0 (0.0)                    | 4 (10.8)                           | .0851          |
| None                                     | 1 (1.2)                               | 1 (2.9)                    | 2 (5.4)                            | .3428          |
| Other (specify)                          | 0 (0.0)                               | 1 (2.9)                    | 1 (2.7)                            | .2198          |
| <b>Fourth-line treatment for mild OA</b> |                                       |                            |                                    |                |
| Lifestyle changes, e.g., diet/exercise   | 7 (8.6)                               | 2 (5.7)                    | 0 (0.0)                            | .175           |

|                                |           |           |           |       |
|--------------------------------|-----------|-----------|-----------|-------|
| Over-the-counter therapy       | 3 (3.7)   | 2 (5.7)   | 0 (0.0)   | .3365 |
| Dietary supplements            | 4 (4.9)   | 3 (8.6)   | 3 (8.1)   | .6884 |
| Nonselective NSAID             | 3 (3.7)   | 4 (11.4)  | 1 (2.7)   | .2179 |
| Selective NSAID                | 15 (18.5) | 8 (22.9)  | 2 (5.4)   | .1    |
| Other nonopioid analgesic      | 7 (8.6)   | 4 (11.4)  | 2 (5.4)   | .6345 |
| Weak opioid analgesic          | 16 (19.8) | 4 (11.4)  | 7 (18.9)  | .5434 |
| Strong-acting opioid analgesic | 30 (37.0) | 8 (22.9)  | 13 (35.1) | .3194 |
| Corticosteroid                 | 29 (35.8) | 8 (22.9)  | 6 (16.2)  | .0659 |
| Topical analgesic              | 15 (18.5) | 3 (8.6)   | 4 (10.8)  | .291  |
| Surgery                        | 36 (44.4) | 13 (37.1) | 20 (54.1) | .3487 |
| None                           | 4 (4.9)   | 2 (5.7)   | 5 (13.5)  | .2752 |

Data are n (%) of physicians. *P* value for comparison across physician specialties.

NSAID, nonsteroidal anti-inflammatory drug; OA, osteoarthritis.

**Table S2.** Treatment strategy for patients with moderate/severe OA

|                                                     | Primary care<br>physician<br>(n = 81) | Rheumatologist<br>(n = 35) | Orthopaedic<br>surgeon<br>(n = 37) | P value |
|-----------------------------------------------------|---------------------------------------|----------------------------|------------------------------------|---------|
| <b>First-line treatment for moderate/severe OA</b>  |                                       |                            |                                    |         |
| Lifestyle changes, e.g., diet/exercise              | 57 (70.4)                             | 27 (77.1)                  | 29 (78.4)                          | .5777   |
| Over-the-counter therapy                            | 41 (50.6)                             | 13 (37.1)                  | 18 (48.6)                          | .4004   |
| Dietary supplements                                 | 28 (34.6)                             | 8 (22.9)                   | 9 (24.3)                           | .3291   |
| Nonselective NSAID                                  | 47 (58.0)                             | 16 (45.7)                  | 24 (64.9)                          | .2486   |
| Selective NSAID                                     | 31 (38.3)                             | 8 (22.9)                   | 18 (48.6)                          | .0745   |
| Other nonopioid analgesic                           | 16 (19.8)                             | 7 (20.0)                   | 7 (18.9)                           | .9922   |
| Weak opioid analgesic                               | 5 (6.2)                               | 2 (5.7)                    | 1 (2.7)                            | .7968   |
| Strong-acting opioid analgesic                      | 1 (1.2)                               | 0 (0.0)                    | 1 (2.7)                            | .7214   |
| Corticosteroid                                      | 5 (6.2)                               | 3 (8.6)                    | 5 (13.5)                           | .4374   |
| Topical analgesic                                   | 17 (21.0)                             | 9 (25.7)                   | 7 (18.9)                           | .769    |
| Surgery                                             | 1 (1.2)                               | 0 (0.0)                    | 2 (5.4)                            | .2764   |
| None                                                | 1 (1.2)                               | 0 (0.0)                    | 0 (0.0)                            | 1       |
| <b>Second-line treatment for moderate/severe OA</b> |                                       |                            |                                    |         |
| Lifestyle changes, e.g., diet/exercise              | 17 (21.0)                             | 6 (17.1)                   | 4 (10.8)                           | .4029   |
| Over-the-counter therapy                            | 16 (19.8)                             | 5 (14.3)                   | 4 (10.8)                           | .4436   |
| Dietary supplements                                 | 17 (21.0)                             | 6 (17.1)                   | 4 (10.8)                           | .4029   |
| Nonselective NSAID                                  | 27 (33.3)                             | 10 (28.6)                  | 10 (27.0)                          | .7509   |
| Selective NSAID                                     | 40 (49.4)                             | 16 (45.7)                  | 21 (56.8)                          | .6254   |
| Other nonopioid analgesic                           | 28 (34.6)                             | 14 (40.0)                  | 16 (43.2)                          | .6388   |
| Weak opioid analgesic                               | 30 (37.0)                             | 11 (31.4)                  | 5 (13.5)                           | .0347   |
| Strong-acting opioid analgesic                      | 10 (12.3)                             | 2 (5.7)                    | 1 (2.7)                            | .2106   |
| Corticosteroid                                      | 15 (18.5)                             | 14 (40.0)                  | 18 (48.6)                          | .0018   |
| Topical analgesic                                   | 26 (32.1)                             | 10 (28.6)                  | 14 (37.8)                          | .6948   |
| Surgery                                             | 4 (4.9)                               | 1 (2.9)                    | 4 (10.8)                           | .3794   |
| <b>Third-line treatment for moderate/severe OA</b>  |                                       |                            |                                    |         |
| Lifestyle changes, e.g., diet/exercise              | 13 (16.0)                             | 7 (20.0)                   | 3 (8.1)                            | .3446   |
| Over-the-counter therapy                            | 2 (2.5)                               | 4 (11.4)                   | 2 (5.4)                            | .1034   |
| Dietary supplements                                 | 6 (7.4)                               | 3 (8.6)                    | 3 (8.1)                            | 1       |
| Nonselective NSAID                                  | 11 (13.6)                             | 10 (28.6)                  | 3 (8.1)                            | .0435   |
| Selective NSAID                                     | 20 (24.7)                             | 8 (22.9)                   | 7 (18.9)                           | .7867   |
| Other nonopioid analgesic                           | 17 (21.0)                             | 9 (25.7)                   | 6 (16.2)                           | .6122   |
| Weak opioid analgesic                               | 29 (35.8)                             | 12 (34.3)                  | 12 (32.4)                          | .9371   |
| Strong-acting opioid analgesic                      | 29 (35.8)                             | 9 (25.7)                   | 7 (18.9)                           | .1506   |
| Corticosteroid                                      | 30 (37.0)                             | 15 (42.9)                  | 15 (40.5)                          | .8256   |
| Topical analgesic                                   | 22 (27.2)                             | 5 (14.3)                   | 4 (10.8)                           | .0741   |
| Surgery                                             | 12 (14.8)                             | 3 (8.6)                    | 11 (29.7)                          | .0431   |
| None                                                | 0 (0.0)                               | 1 (2.9)                    | 1 (2.7)                            | .2198   |

|                                                     |           |           |           |       |
|-----------------------------------------------------|-----------|-----------|-----------|-------|
| Other (specify)                                     | 0 (0.0)   | 1 (2.9)   | 0 (0.0)   | .2288 |
| <b>Fourth-line treatment for moderate/severe OA</b> |           |           |           |       |
| Lifestyle changes, e.g., diet/exercise              | 12 (14.8) | 5 (14.3)  | 1 (2.7)   | .1218 |
| Over-the-counter therapy                            | 3 (3.7)   | 2 (5.7)   | 0 (0.0)   | .3365 |
| Dietary supplements                                 | 4 (4.9)   | 3 (8.6)   | 2 (5.4)   | .7449 |
| Nonselective NSAID                                  | 4 (4.9)   | 3 (8.6)   | 0 (0.0)   | .1618 |
| Selective NSAID                                     | 6 (7.4)   | 8 (22.9)  | 1 (2.7)   | .0125 |
| Other nonopioid analgesic                           | 6 (7.4)   | 5 (14.3)  | 0 (0.0)   | .0511 |
| Weak opioid analgesic                               | 12 (14.8) | 7 (20.0)  | 6 (16.2)  | .7861 |
| Strong-acting opioid analgesic                      | 30 (37.0) | 18 (51.4) | 16 (43.2) | .3464 |
| Corticosteroid                                      | 32 (39.5) | 7 (20.0)  | 4 (10.8)  | .0027 |
| Topical analgesic                                   | 10 (12.3) | 5 (14.3)  | 3 (8.1)   | .7117 |
| Surgery                                             | 49 (60.5) | 23 (65.7) | 24 (64.9) | .8275 |
| None                                                | 3 (3.7)   | 0 (0.0)   | 4 (10.8)  | .0891 |

Data are n (%) of physicians. *P* value for comparison across physician specialties

NSAID, nonsteroidal anti-inflammatory drug; OA, osteoarthritis.

**Table S3.** Physician ratings of medication performance against attributes for the treatment of OA-related pain

| Attribute                   | Medication                | Primary care          | Rheumatologist | Orthopaedic         | P value |
|-----------------------------|---------------------------|-----------------------|----------------|---------------------|---------|
|                             |                           | physician<br>(n = 81) |                | surgeon<br>(n = 37) |         |
| Efficacy†                   | Overall medications       | 0.3 (0.74)            | −0.0 (0.80)    | −0.1 (0.92)         | .0195   |
|                             | NSAID                     | 0.3 (0.95)            | 0.0 (1.00)     | 0.0 (0.90)          | .1009   |
|                             | Nonopioid analgesic       | 0.1 (1.02)            | −0.2 (0.92)    | −0.4 (1.01)         | .0410   |
|                             | Weak opioid               | 0.2 (0.95)            | −0.2 (1.10)    | −0.5 (1.32)         | .0122   |
|                             | Strong opioid             | 0.5 (1.03)            | 0.2 (1.23)     | −0.1 (1.40)         | .0248   |
|                             | Injectable corticosteroid | 1.1 (1.04)            | 0.8 (0.97)     | 0.9 (0.94)          | .3579   |
|                             | Topical analgesic         | −0.3 (1.19)           | −0.6 (1.14)    | −0.6 (1.38)         | .2545   |
| Safety‡                     | Overall medications       | 0.3 (0.79)            | 0.3 (0.99)     | 0.3 (0.88)          | .9588   |
|                             | NSAID                     | 0.1 (1.03)            | −0.1 (1.15)    | 0.2 (1.14)          | .4220   |
|                             | Nonopioid analgesic       | 0.4 (1.09)            | 0.4 (1.22)     | 0.5 (1.22)          | .9768   |
|                             | Weak opioid               | −0.2 (1.17)           | −0.1 (1.23)    | −0.5 (1.19)         | .2266   |
|                             | Strong opioid             | −0.4 (1.09)           | −0.3 (1.27)    | −0.8 (1.18)         | .1355   |
|                             | Injectable corticosteroid | 0.7 (1.03)            | 0.8 (1.26)     | 0.9 (0.97)          | .4597   |
|                             | Topical analgesic         | 1.6 (1.00)            | 1.5 (1.17)     | 1.7 (1.13)          | .8286   |
| Convenience/ acceptability§ | Overall medications       | 1.4 (0.82)            | 1.3 (0.91)     | 1.4 (0.96)          | .9591   |
|                             | NSAID                     | 1.8 (0.94)            | 1.5 (0.98)     | 1.7 (1.03)          | .3250   |
|                             | Nonopioid analgesic       | 1.6 (0.99)            | 1.5 (1.04)     | 1.6 (1.12)          | .8941   |
|                             | Weak opioid               | 1.3 (1.06)            | 1.3 (1.13)     | 1.2 (1.21)          | .9170   |
|                             | Strong opioid             | 1.1 (1.07)            | 1.2 (1.03)     | 1.1 (1.37)          | .8108   |
|                             | Injectable corticosteroid | 0.9 (0.99)            | 1.1 (1.02)     | 1.0 (0.90)          | .6614   |
|                             | Topical analgesic         | 1.2 (1.10)            | 1.2 (0.97)     | 1.3 (0.96)          | .9395   |
| Cost consideration¶         | Overall medications       | 1.0 (0.93)            | 0.8 (1.14)     | 0.9 (1.00)          | .4996   |
|                             | NSAID                     | 1.5 (1.13)            | 1.0 (1.16)     | 1.4 (1.04)          | .1018   |
|                             | Nonopioid analgesic       | 1.4 (1.17)            | 0.9 (1.39)     | 1.5 (1.12)          | .0624   |
|                             | Weak opioid               | 1.0 (1.31)            | 0.8 (1.24)     | 0.5 (1.48)          | .2353   |
|                             | Strong opioid             | 0.8 (1.35)            | 0.7 (1.32)     | 0.4 (1.62)          | .2617   |
|                             | Injectable corticosteroid | 0.4 (1.28)            | 1.1 (1.35)     | 0.7 (1.62)          | .0482   |
|                             | Topical analgesic         | 0.6 (1.53)            | 0.2 (1.60)     | 0.7 (1.60)          | .3328   |
| Quality of life††           | Overall medications       | 0.8 (0.86)            | 0.5 (0.93)     | 0.4 (1.13)          | .0884   |
|                             | NSAID                     | 0.9 (1.02)            | 0.4 (1.22)     | 0.5 (1.19)          | .1045   |
|                             | Nonopioid analgesic       | 0.7 (1.10)            | 0.5 (0.98)     | 0.4 (1.26)          | .3677   |
|                             | Weak opioid               | 0.6 (1.11)            | 0.4 (1.06)     | −0.2 (1.36)         | .0035   |
|                             | Strong opioid             | 0.6 (1.16)            | 0.5 (1.09)     | −0.3 (1.54)         | .0033   |
|                             | Injectable corticosteroid | 1.3 (1.00)            | 1.1 (0.99)     | 1.2 (1.18)          | .7907   |
|                             | Topical analgesic         | 0.6 (1.20)            | 0.3 (1.30)     | 0.6 (1.57)          | .5642   |

Data are mean score (standard deviation) of attributes within each category with scores ranging per attribute from −3 (performs very badly) to +3 (performs very well). P value for comparison across physician specialties.

†Mean of 8 attributes: effective relief of pain at rest, effective relief of pain on movement, reduces number of tender/swollen joints, maintains symptomatic relief over time without need to increase dose/alter frequency, rapid onset of action, effective in controlling acute flares, slows disease progression and, delays need for surgery.

‡Mean of 9 attributes: safe long-term use, good gastrointestinal safety, low incidence of serious adverse events/severe side effects, suitable for patients with cardiovascular risk, can be used continuously (without a drug break), appropriate for use in the elderly (>65 years), no need for frequent monitoring/testing, low risk of addiction/abuse and, can be used in combination with other pain drugs.

§Mean of 6 attributes: ease of administration for patient, convenient dosing schedule, physician familiarity/experience, on formulary/hospital approved drug list, can be used in combination with other OA therapies and, accordance with treatment guidelines.

¶Mean of 2 attributes: low out of pocket cost/affordability for patient and, low cost/affordable for physician/practice.

††Mean of 6 attributes: improves/maintains attendance at work, improves/maintains ability to perform activities of daily living/leisure activities, improves/maintains relationships/social life, improves patient functionality, improves patient's sleep patterns/quality of sleep and, improves/maintains patient's independence.

NSAID, nonsteroidal anti-inflammatory drug; OA, osteoarthritis.

**Table S4.** Physician perceptions related to the use of opioids: barriers to prescribing

| Characteristics                                      | Primary care          | Rheumatologist | Orthopaedic         | P value |
|------------------------------------------------------|-----------------------|----------------|---------------------|---------|
|                                                      | physician<br>(n = 81) |                | surgeon<br>(n = 37) |         |
| Barriers to opioid prescribing                       |                       |                |                     |         |
| Fear of addiction                                    | 33.0 (24.27)          | 21.8 (24.86)   | 24.9 (23.67)        | .0459   |
| Fear of drug abuse                                   | 14.2 (15.51)          | 14.1 (12.48)   | 13.0 (10.17)        | .8996   |
| Lack of efficacy as a chronic OA pain treatment      | 9.5 (13.94)           | 11.6 (16.03)   | 20.0 (26.67)        | .0157   |
| Side effects                                         | 10.6 (10.14)          | 12.0 (10.74)   | 14.6 (17.22)        | .2696   |
| Tolerance                                            | 9.4 (9.92)            | 7.2 (8.38)     | 8.5 (11.95)         | .5574   |
| Guidelines/local restrictions                        | 5.2 (9.52)            | 13.1 (23.01)   | 5.8 (11.64)         | .0212   |
| Fear of drug diversion                               | 5.8 (12.50)           | 5.8 (7.63)     | 3.6 (4.66)          | .5209   |
| General lack of comfort in prescribing opioids       | 5.5 (13.65)           | 6.1 (7.08)     | 3.1 (7.11)          | .4438   |
| Patient preference (i.e., patient refusal of opioid) | 2.9 (4.72)            | 3.2 (4.75)     | 3.3 (4.27)          | .8892   |
| Other                                                | 2 (12.89)             | 2.9 (16.9)     | –                   | .5947   |
| No barriers at all                                   | 1.9 (6.57)            | 2.2 (7.71)     | 3.2 (11.01)         | .6873   |

Data are mean score (standard deviation) of physician allocated points out of 100 distributed based on level of importance across the list of attributes such that higher scores = greater perceived barrier. *P* value for comparison across physician specialties.

OA, osteoarthritis.
